# Supplementary material
Source: Research Square preprint supplement (doi:10.21203/rs.3.rs-8347225/v1)
Supplement: Supplementary file 1 [file 94a7ca2a2bd2c997932bbd68.pdf]

**Supplementary information**

**Additional file 2**

## **Copper-lignin with laccase-mediated polymerization fixation for wood preservation: determination of durability in marine environment using novel technologies**

Cristian Bolaño Losada<sup>1</sup>, Carmen Fernández-Costas<sup>1</sup> and Diego Moldes<sup>1</sup>

1 CINTECX, Department of Chemical Engineering, Universidade de Vigo, Campus Universitario As Lagoas–Marcosende, 36310 Vigo, Spain

\*Corresponding author Cristian Bolaño Losada, [crisgalbo26@gmail.com](mailto:crisgalbo26@gmail.com)

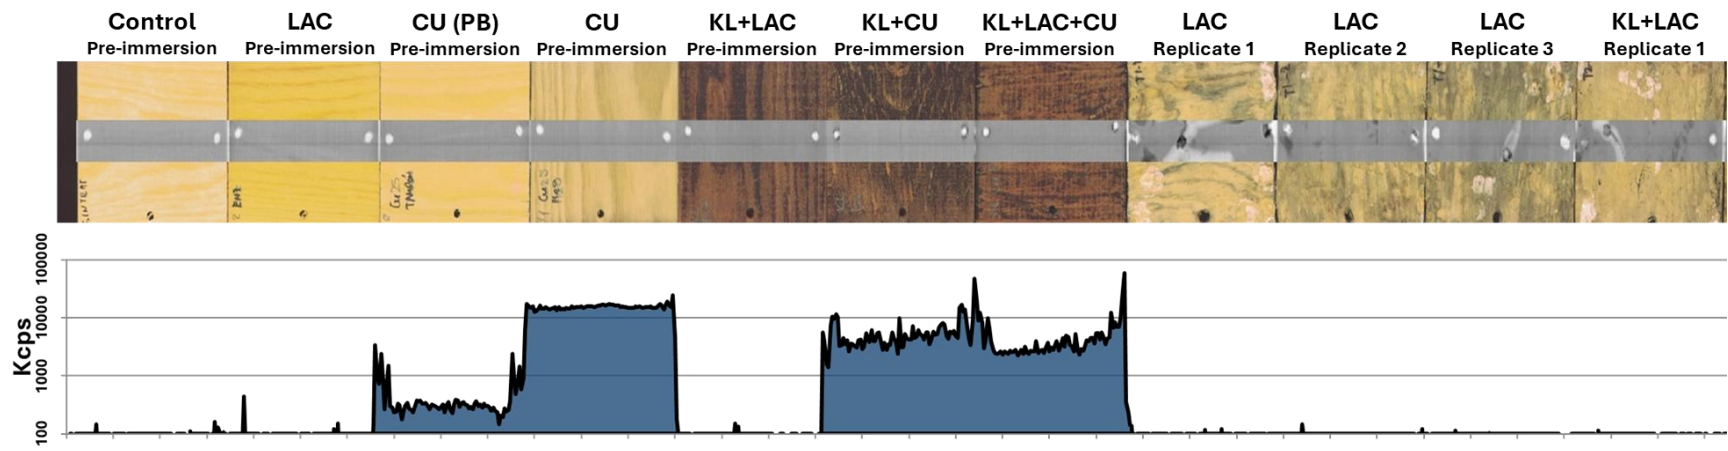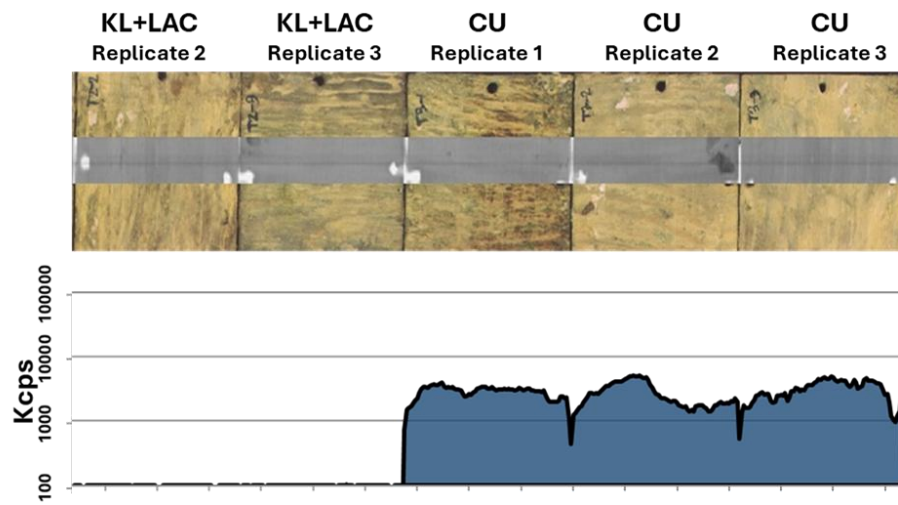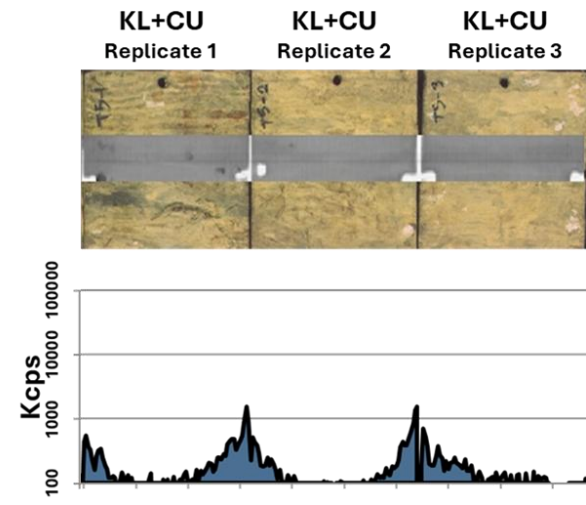

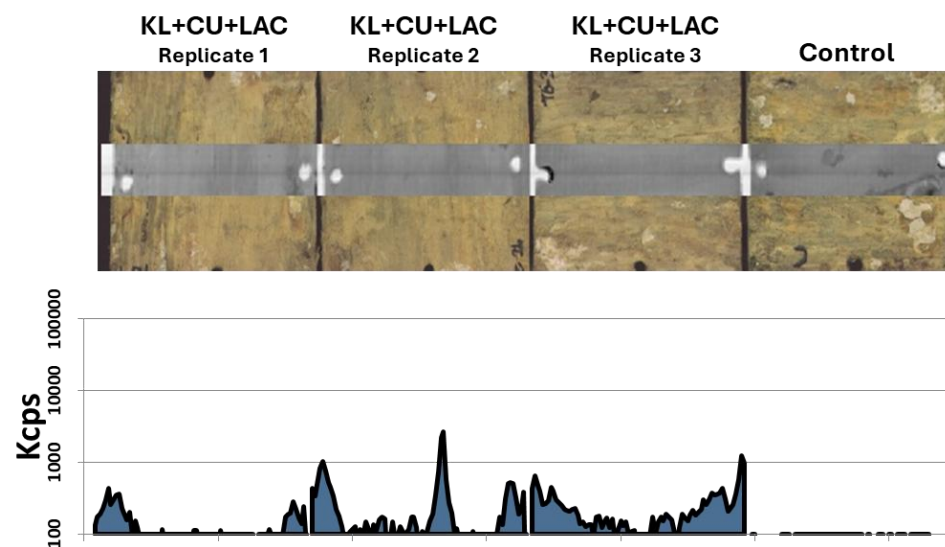

Figure S1. Itrax Core Scanner analysis of the pre-immersed and post immersed samples. On top, RGB image of the samples with the overlaid X-ray radiography; on the bottom, the corresponding ED-XRF copper values in kilo counts per second (Kcps) units. Note axis Y is in logarithmic scale in base 10.

**Control**  
Pre-immersion

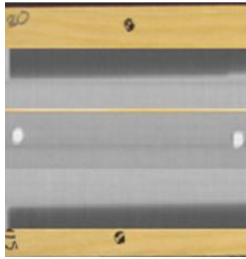

**LAC**  
Pre-immersion

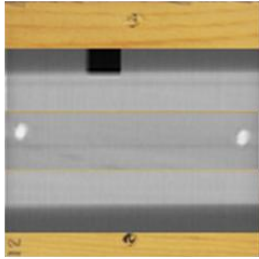

**CU**  
Pre-immersion

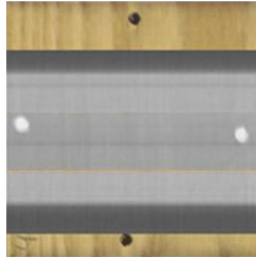

**KL+LAC**  
Pre-immersion

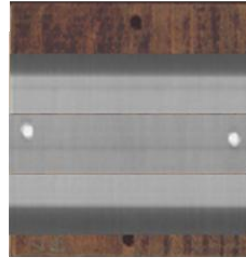

**KL+CU**  
Pre-immersion

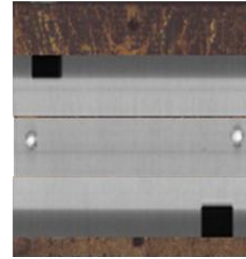

**KL+LAC+CU**  
Pre-immersion

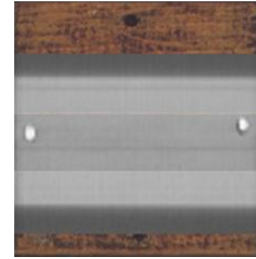

**LAC**  
Replicate 1

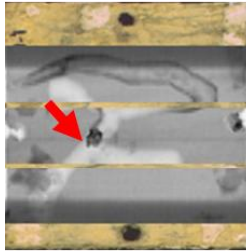

**LAC**  
Replicate 2

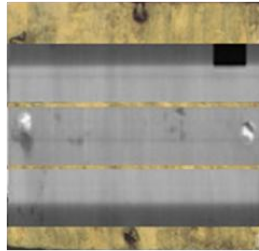

**LAC**  
Replicate 3

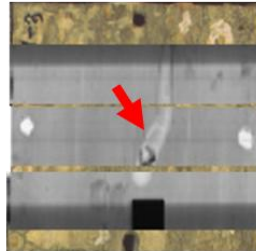

**KL+LAC**  
Replicate 1

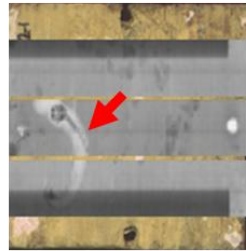

**KL+LAC**  
Replicate 2

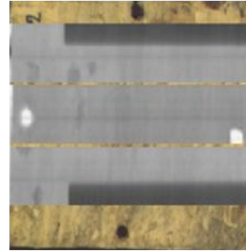

**KL+LAC**  
Replicate 3

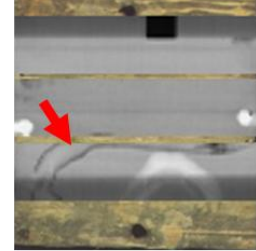

**CU**  
Replicate 1

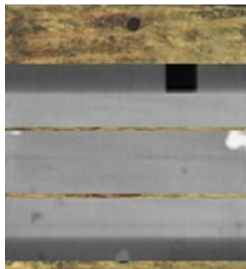

**CU**  
Replicate 2

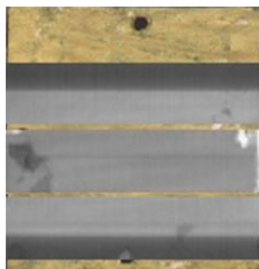

**CU**  
Replicate 3

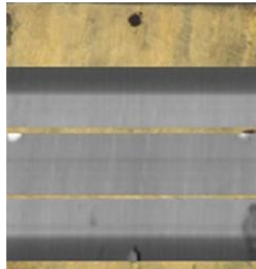

**KL+CU**  
Replicate 1

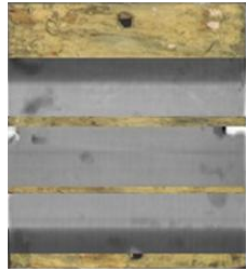

**KL+CU**  
Replicate 2

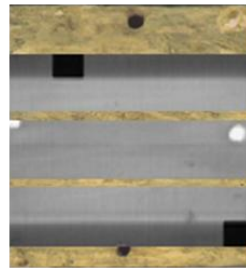

**KL+CU**  
Replicate 3

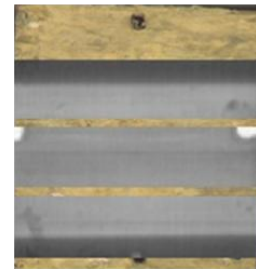

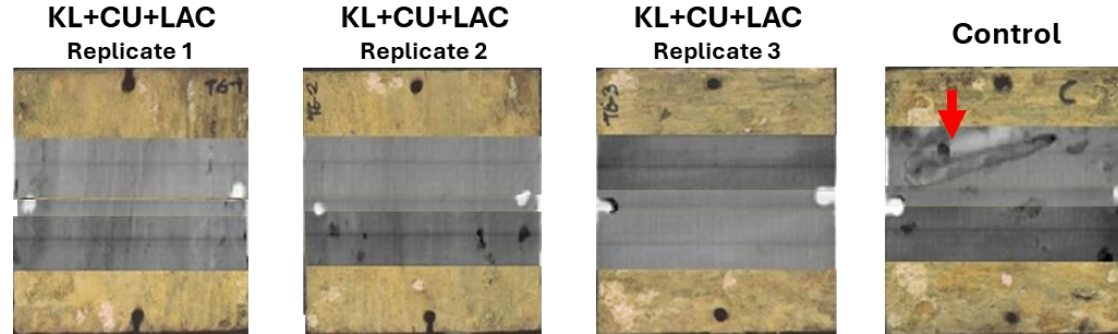

Figure S2. X-ray radiographies of all the wood treated samples acquired by Itrax Core Scanner. The RGB images were overlaid by three different X-ray scans acquired by separation of 1 cm from the central position and overlapped accordingly. Red arrows indicate the presence of boring organisms (teredo).

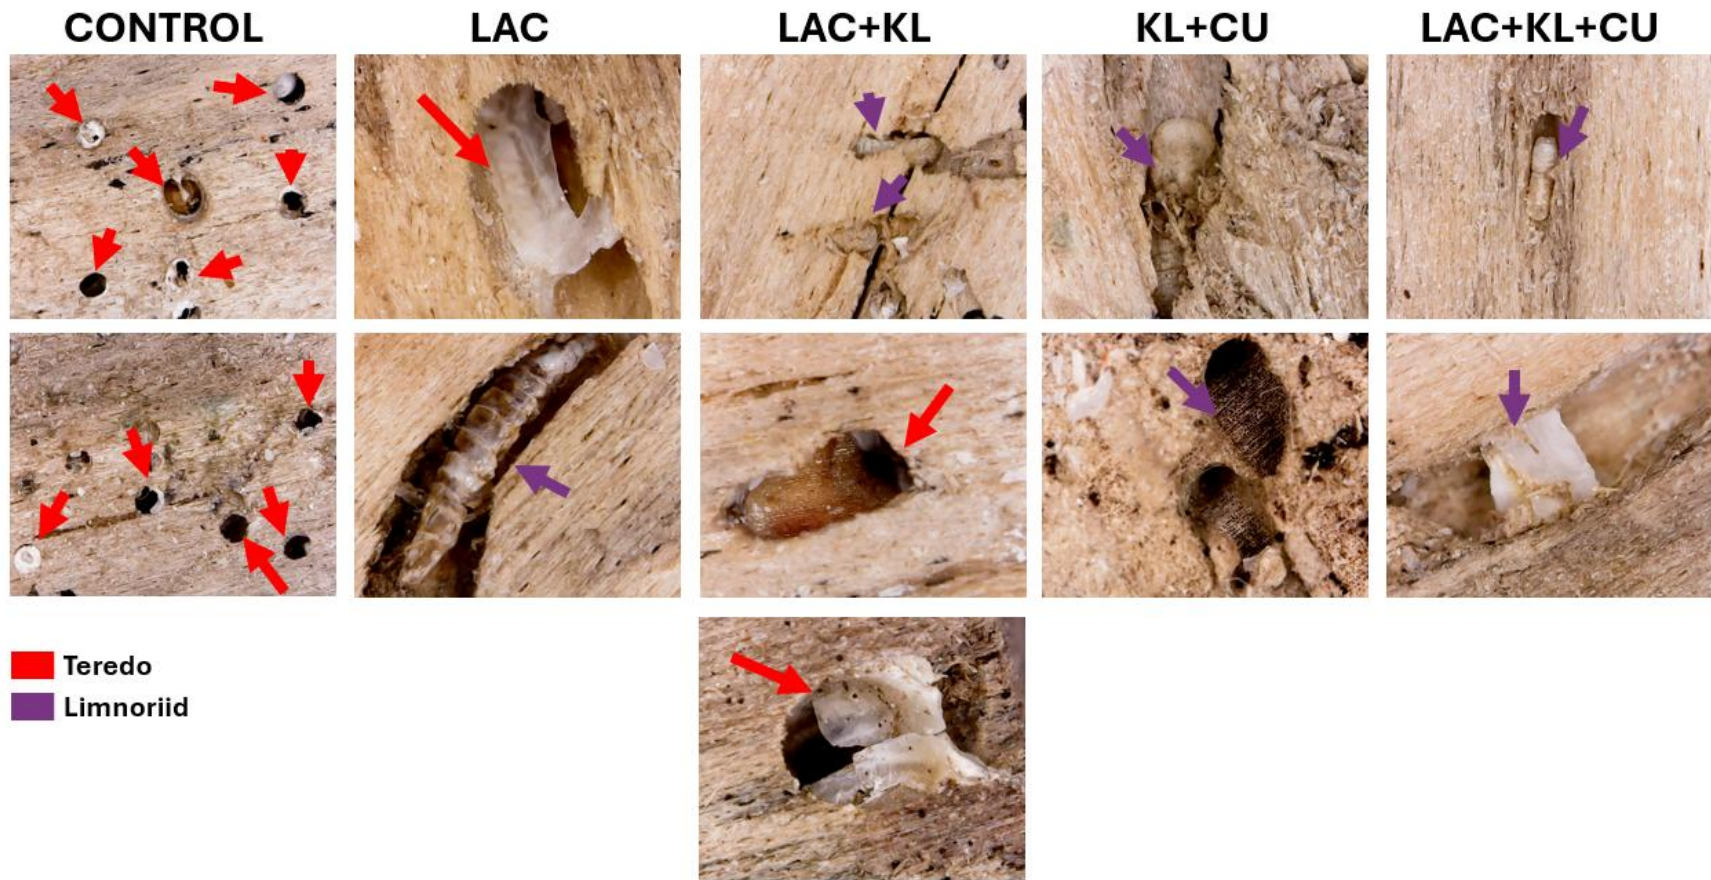

Figure S3. Pictures acquired by a USB digital lens camera on the samples' surface. Red arrows indicate presence of teredos and violet arrows indicate presence of limnoriids.
